# Supplementary material for: The Biological Effects of Double-Dose Alpha-1 Antitrypsin Augmentation Therapy. A Pilot Clinical Trial
Source: PubMed Central journal article supplement — Am J Respir Crit Care Med. 2019 Aug 1;200(3):318–26. doi: 10.1164/rccm.201901-0010OC (PMC6680306; doi:10.1164/rccm.201901-0010oc), 2019-08-01
Supplement: rccm.201901-0010OC_campos_data_supplement.pdf [file rccm.201901-0010OC_campos_data_supplement.pdf]

## **Online Data Supplement**

### **The biological effects of double-dose Alpha 1 Antitrypsin augmentation therapy: A pilot study**

Michael A. Campos, Patrick Geraghty, Gregory Holt, Eliana Mendes, Paul R. Newby, Shuren Ma, , Landy V Luna-Diaz, Gerard M. Turino, Robert A. Stockley

## **Supplementary methods**

### **Procedure to switch the brand of Alpha 1 Antitrypsin (AAT) therapy to Zemaira®**

All study phases were performed using Zemaira® (CLS Behring, King of Prussia, PA, USA) as the augmentation therapy brand. Subjects with Alpha 1 Antitrypsin Deficiency (AATD) receiving AAT therapy with a brand other than Zemaira® (Glassia®, Shire; Prolastin®, Grifols, Inc.; Aralast™, Alpha Therapeutic Corporation), who were interested in participating in the study, were required to switch to Zemaira at least one month prior to study enrollment. The switching procedure was as follows:

- All patients were required to provide informed consent.
- The switch required coordination and approval by the patient's insurance company; if denied, the patient was considered to have failed the screening process.
- Each patient was given regular Zemaira® infusions at 60 mg/kg/week for at least 4 weeks prior to starting study procedures (study day 1).
- After conclusion of the study, the brand of AAT therapy to be used was based on patient preference.

### **Bronchoscopy**

Bronchoscopy was performed under conscious sedation in a monitored setting as for usual clinical care according to published guidelines (1, 2). Procedure overview:

#### ***Bronchoalveolar lavage***

1. After airway inspection, the bronchoscope was wedged in the right middle lobe or lingula and the collection trap was placed directly onto the bronchoscope's suction pipe.
2. Warmed normal saline (20 mL) was infused and the contents were gently aspirated; this first aspirate was placed in the collection trap in an ice bucket (contents labelled "bronchial BAL").
3. A new specimen trap was placed next to the bronchoscope and two additional 20-mL infusions of normal saline were infused; the aspirates were placed in the collection trap in an ice bucket (label contents as "alveolar BAL").

4. The total volumes infused for each bronchial and alveolar specimen were recorded.
5. Samples were kept on ice and immediately centrifuged at 1200 rpm for 10 minutes; supernatants were stored at  $-80^{\circ}\text{C}$  in 1.5 mL aliquots until processed.

### ***Blood samples***

1. Blood for cytokines and other specific research measures was collected in EDTA tubes and centrifuged at 2500 (RC) for 15 minutes at  $4^{\circ}\text{C}$ ; isolated plasma was stored in 1 mL aliquots at  $-80^{\circ}\text{C}$ .
2. Blood used for AAT, C-reactive protein and clinical laboratory measures was collected in citrate and EDTA tubes and sent to the local clinical laboratory for processing (Quest Diagnostics, Secaucus , NJ)

**Table E1:** Inclusion and exclusion criteria

| Inclusion criteria                                                                                                                                                                                                                                                                                                                                                                                                                                                                                                                                                                                                                                                                                                                                                                                                                                                                                                                                                                                                                                                                                                                                                                                                                                                                                                                                                                                    | Exclusion criteria                                                                                                                                                                                                                                                                                                                                                                                                                                                                                                                                                                                                                                                                                                                                |
|-------------------------------------------------------------------------------------------------------------------------------------------------------------------------------------------------------------------------------------------------------------------------------------------------------------------------------------------------------------------------------------------------------------------------------------------------------------------------------------------------------------------------------------------------------------------------------------------------------------------------------------------------------------------------------------------------------------------------------------------------------------------------------------------------------------------------------------------------------------------------------------------------------------------------------------------------------------------------------------------------------------------------------------------------------------------------------------------------------------------------------------------------------------------------------------------------------------------------------------------------------------------------------------------------------------------------------------------------------------------------------------------------------|---------------------------------------------------------------------------------------------------------------------------------------------------------------------------------------------------------------------------------------------------------------------------------------------------------------------------------------------------------------------------------------------------------------------------------------------------------------------------------------------------------------------------------------------------------------------------------------------------------------------------------------------------------------------------------------------------------------------------------------------------|
| <ul style="list-style-type: none"> <li>– Males or females aged between 18 and 75 years</li> <li>– Diagnosis of AATD               <ul style="list-style-type: none"> <li>– PiZZ, PiSZ or Znull</li> <li>– Baseline AAT level &lt;11 <math>\mu\text{M}^\dagger</math></li> </ul> </li> <li>– Evidence of COPD (emphysema or airflow obstruction) with <math>\text{FEV}_1</math> &lt;80% predicted</li> <li>– Receiving therapy with Zemaira® for <math>\geq 1</math> month at the standard dose of 60 mg/kg/week</li> <li>– At least one of the following criteria of disease severity:               <ol style="list-style-type: none"> <li>1. Two or more acute exacerbations in the past 12 months                   <ul style="list-style-type: none"> <li>– Defined as the use of antibiotics and a course of steroids to treat a flare of pulmonary symptoms, regardless of whether or not the subject required ER care or hospital admission</li> </ul> </li> <li>2. SGRQ total score &gt;60</li> <li>3. Chronic bronchitis                   <ul style="list-style-type: none"> <li>– Defined as daily or almost daily sputum expectoration at least 3 months of the year for at least two consecutive years</li> </ul> </li> <li>4. Documented <math>\text{FEV}_1</math> decline of <math>\geq 60</math> mL/year for two consecutive years while receiving AAT therapy</li> </ol> </li> </ul> | <ul style="list-style-type: none"> <li>– <math>\text{FEV}_1</math> &lt;40% predicted (bronchoscopy safety)</li> <li>– Patients participating in other clinical trials</li> <li>– Recent exacerbation (&lt;4 weeks)</li> <li>– Use of chronic antibiotics or oral steroids</li> <li>– Continued smoking (per patient report)</li> <li>– Contraindications for bronchoscopy (i.e., coagulopathy or severe hypoxemia)</li> <li>– Inability to sign informed consent</li> <li>– Use of systemic steroids within the last month</li> <li>– Pregnant or wishing to become pregnant</li> <li>– Known IgA deficiency (only patients already receiving AAT therapy will be included; therefore, unlikely to encounter this exclusion criterion)</li> </ul> |

<sup>†</sup>Historical baseline AAT levels were obtained from medical records and correspond to levels recorded before the initiation of AAT therapy

AAT, alpha-1 antitrypsin; AATD, alpha-1 antitrypsin Deficiency; COPD, chronic obstructive pulmonary disease; ER, emergency room;  
FEV<sub>1</sub>, forced expiratory volume in one second; SGRQ, St. George's Respiratory Questionnaire

**Table E2:** Patient pulmonary function following AAT therapy for patients who completed all study procedures (n=8)

| <b>Variables<br/>Mean ± StD</b>     | <b>SD AAT therapy<br/>(60 mg/kg/week)</b> | <b>DD AAT therapy<br/>(120 mg/kg/week)</b> |
|-------------------------------------|-------------------------------------------|--------------------------------------------|
| <b>FVC, L</b>                       | 3.8 ± 0.4                                 | 3.8 ± 0.3                                  |
| <b>FVC, % predicted</b>             | 88.3 ± 5.3                                | 87.9 ± 5.1                                 |
| <b>FEV<sub>1</sub>, L</b>           | 1.7 ± 2.3                                 | 1.8 ± 2.4                                  |
| <b>FEV, % predicted</b>             | 50.9 ± 4.1                                | 53.9 ± 4.4                                 |
| <b>FEV<sub>1</sub>/FVC</b>          | 44.8 ± 2.2                                | 47.7 ± 2.5                                 |
| <b>TLC, L</b>                       | 7.9 ± 0.4                                 | –                                          |
| <b>TLC, % predicted</b>             | 123.3 ± 7.5                               | –                                          |
| <b>IC, L</b>                        | 2.7 ± 0.3                                 | –                                          |
| <b>IC, % predicted</b>              | 88.3 ± 6.9                                | –                                          |
| <b>DL<sub>CO</sub>, % predicted</b> | 57.0 ± 5.4                                | –                                          |

AAT, alpha 1 antitrypsin; DD, double dose; DL<sub>CO</sub>, diffusing capacity of the lungs for carbon monoxide; FEV, forced expiratory volume; FEV<sub>1</sub>, forced expiratory volume in 1 second; FVC, forced vital capacity; IC, inspiratory capacity; StD, standard deviation; TLC, total lung capacity

**Table E3:** Pathway analysis of cytokines studied

| Pathway                                | Genes involved                                                                                                        |
|----------------------------------------|-----------------------------------------------------------------------------------------------------------------------|
| Cytokine-cytokine receptor interaction | CCL11, CCL3, CCL7, CSF1, CSF2, IFN $\gamma$ , IL-10, IL-15, IL12p40, IL-17, IL-2, IL-3, IL-4, IL-9, LIF, TNF $\alpha$ |
| Jak-STAT signaling pathway             | CSF2, IFN $\gamma$ , IL-10, IL12p40, 1L-15, 1L-2, IL-3, 1L-4, 1L-9, LIF                                               |
| Rheumatoid arthritis                   | CCL3, CSF1, CSF2, IFN $\gamma$ , IL-15, IL-17, MMP-1, TNF $\alpha$                                                    |
| Inflammatory bowel disease             | IFN $\gamma$ , IL-10, IL12p40, 1L-17, IL-2, IL-4, TNF $\alpha$                                                        |
| Asthma                                 | CCL11, IL-10, IL-3, IL-4, IL-9, TNF $\alpha$                                                                          |
| T cell receptor signaling pathway      | CSF2, IFN $\gamma$ , IL-10, IL-2, IL-4, TNF $\alpha$                                                                  |
| TNF signaling                          | CSF1, CSF2, IL-15, LIF, MMP-9, TNF $\alpha$                                                                           |
| Allograft rejection                    | IFN $\gamma$ , IL-10, IL12p40, 1L-2, IL-4, TNF $\alpha$                                                               |

CCL, chemokine (C-C motif) ligand; CSF, Colony Stimulating Factor; IFN, interferon; IL, interleukin;

LIF, leukemia inhibitory factor; MMP, matrix metalloproteinase; TNF, tumor necrosis factor

**Table E4:** BALF concentrations of multiple cytokines, chemokines, and growth factors following the three phases of AAT therapy

| BALF concentration,<br>pg/mL | AAT therapy phase   |                      |                     | p value<br>SD vs. DD* / DD vs. SD** |
|------------------------------|---------------------|----------------------|---------------------|-------------------------------------|
|                              | SD                  | DD                   | SD                  |                                     |
| G-CSF                        | 58.4 (11–111)       | 35.3 (8–66)          | 61.4 (23–95)        | 0.146 / 0.175                       |
| IFN $\alpha$ 2               | 335.7 (97–627)      | 266.3 (120–547)      | 217.2 (56–513)      | 0.330 / 0.163                       |
| IL-1 $\alpha$                | 405.2 (89–1686)     | 185 (55–550)         | 227.5 (91–658)      | 0.148 / 0.250                       |
| LIF                          | 810.5 (154–1788)    | 353.8 (212–987)      | 366.5 (180–968)     | 0.148 / 0.547                       |
| IL-15                        | 1360 (342–4692)     | 681.7 (363–2247)     | 694.0 (294–1832)    | 0.074 / 0.062                       |
| MCP3                         | 395.2 (65–816)      | 198.5 (88–355)       | 170.1 (82–462)      | 0.078 / 0.077                       |
| IL-1 $\beta$                 | 94 (12–334)         | 55.4 (13–254)        | 16.0 (8–101)        | 0.919 / 0.110                       |
| IL-1RA                       | 3229 (2043–63378)   | 3913 (2342–25161)    | 2447 (434–45566)    | 0.688 / 0.461                       |
| IL-2RA                       | 288.8 (87–691)      | 136.0 (55–612)       | 177.8 (57–501)      | 0.250 / 0.742                       |
| IL-5                         | 99.1 (3–231)        | 66.9 (32–148)        | 53.5 (10–132)       | 0.651 / 0.337                       |
| IL-6                         | 618.9 (198–1606)    | 650.2 (141–959)      | 328.4 (142–739)     | 0.396 / 0.187                       |
| IL-7                         | 1085 (408–3503)     | 1118 (594–2064)      | 837.6 (418–1826)    | 0.547 / 0.641                       |
| IL-8                         | 5467 (1235–24522)   | 4277 (642–11208)     | 3115 (1243–9061)    | 0.844 / 0.547                       |
| IL-12p70                     | 924.2 (319–1919)    | 655.1(286–1034)      | 547.1 (182–1388)    | 0.184 / 0.687                       |
| IL-13                        | 112.4(47–234)       | 132.7 (27–232)       | 73.1 (16–160)       | 0.102 / 0.082                       |
| IL-16                        | 5542 (2225–20664)   | 5175 (2259–20253)    | 5428 (1172–15891)   | 0.844 / 0.383                       |
| IL-18                        | 124.2 (56–222)      | 65.2 (32–188)        | 52.6 (26–180)       | 0.109 / 0.383                       |
| CXCL1/GRO $\alpha$           | 41773 (8418–97319)  | 19792 (8164–55949)   | 23117 (13633–60566) | 0.109 / 0.945                       |
| CXCL9                        | 5058 (2395–8382)    | 3760 (1532–34187)    | 3716 (516–8598)     | 0.844 / 0.195                       |
| CXCL-10/IP-10                | 37121 (23474–97909) | 34164 (11682–143990) | 31762 (9518–50069)  | 0.742 / 0.109                       |
| CXCL12/SDF1 $\alpha$         | 9267 (2439–31167)   | 7166 (4084–18199)    | 6340 (2443–19806)   | 0.461 / 0.641                       |
| CCL2/MCP-1                   | 2029 (697–4200)     | 1132 (341–7744)      | 1052 (285–6651)     | 0.641 / 0.195                       |



|                   |                    |                    |                    |               |
|-------------------|--------------------|--------------------|--------------------|---------------|
| CCL4/MIP1 $\beta$ | 1563 (572–5476)    | 1298 (638–3319)    | 829.0 (413–2683)   | 0.547 / 0.555 |
| PDGF-BB           | 761.4 (324–2072)   | 773.3 (289–968)    | 610.2 (252–1643)   | 0.233 / 0.962 |
| HGF               | 1294 (498–3752)    | 1209 (449–2452)    | 1174 (169–2798)    | 0.445 / 0.767 |
| $\beta$ NGF       | 82.4 (25–157)      | 76.8 (27–118)      | 62.1 (14–123)      | 0.404 / 0.148 |
| VEGF              | 14577 (5397–51697) | 11050 (7419–23795) | 10309 (2970–24458) | 0.461 / 0.641 |
| CCL5/RANTES       | 14577 (5397–51697) | 11050 (7419–23795) | 10309 (2970–24458) | 0.461 / 0.641 |
| CCL27/CTAK        | 845.1 (219–2052)   | 786.9 (181–1674)   | 546.9 (110–2039)   | 0.250 / 0.383 |
| SCF               | 788.9 (355–1492)   | 594.5 (212–901)    | 479.9 (92–953)     | 0.127 / 0.423 |
| SCGF- $\beta$     | 647.2 (43–2895)    | 1332 (311–1867)    | 894.5 (264–1732)   | 0.881 / 0.296 |
| TNF $\beta$       | 5.2 (4–19)         | 4.9 (3–11)         | 5.2 (4–9)          | 0.250 / 0.461 |
| TRAIL             | 7087 (2530–32589)  | 7644 (1750–12137)  | 4443 (2240–9644)   | 0.742 / 0.461 |

Data presented as median (range); \*p value comparing SD (starting doses) to DD; \*\*p value comparing DD to SD (final doses)

AAT, Alpha 1 antitrypsin; CCL, chemokine (C-C motif) ligand; CTACK, Cutaneous T-cell-attracting chemokine; CXC, chemokine (C-X-C motif) ligand;

DD, double dose; FGF, fibroblast growth factor; G-CSF, granulocyte-colony stimulating factor; HGF, hepatocyte growth factor; IFN, interferon; IL, interleukin; IP, Interferon gamma-induced protein; MCP, monocyte chemoattractant protein; MIP, macrophage inflammatory protein; NGF, nerve growth factor; PDGF, platelet-derived growth factor; RANTES, regulated on activation, normal T cell expressed and secreted; SCF, stem cell factor; SCGF, stem cell growth factor; SD, standard dose; SDF, stromal cell-derived factor; TNF, tumor necrosis factor; TRAIL, TNF-related apoptosis-inducing ligand; VEGF, vascular endothelial growth factor

**Table E5:** Plasma concentrations of multiple cytokines, chemokines, and growth factors following the three phases of AAT therapy

| Plasma concentration, pg/mL | AAT therapy phase     |                        |                        | p value<br>SD vs. DD* / DD vs. SD** |
|-----------------------------|-----------------------|------------------------|------------------------|-------------------------------------|
|                             | SD                    | DD                     | SD                     |                                     |
| IL-1 $\beta$                | 6.8 (1–33)            | 7.7 (1–25)             | 5.4 (1–35)             | 0.844 / 0.578                       |
| IL-2                        | 130.0 (9–320)         | 124 (6–227)            | 39.6 (3–292)           | 0.844 / 0.109                       |
| IL-4                        | 13.0 (3–32)           | 11.7 (2–32)            | 6.8 (2–38)             | 0.945 / 0.109                       |
| IL-5                        | 29.3 (2–190)          | 28.1 (1–183)           | 2.9 (1–254)            | 0.742 / 0.313                       |
| IL6                         | 202.4 (9–554)         | 196.9 (11–672)         | 77.9 (5–502)           | 0.945/ 0.063                        |
| IL-10                       | 66.8 (3–232)          | 69.9 (3–178)           | 32.2 (4–229)           | 0.997 / 0.195                       |
| IL-12p70                    | 11.1 (1–34)           | 9.5 (1–35)             | 4.1 (2–52)             | 0.945 / 0.297                       |
| IFN $\gamma$                | 43.7 (7–178)          | 67.9 (6–154)           | 28.0 (5–192)           | 0.945 / 0.383                       |
| TNF $\alpha$                | 4.7 (1–27)            | 8.2 (1–20)             | 4.1 (1–38)             | 0.688 / 0.578                       |
| $\alpha$ -2 macroglobulin   | 114356 (50275–633741) | 138640 (60392–636758)  | 192000 (60773–307520)  | 0.742 / 0.195                       |
| CRP                         | 364.3 (118–1037)      | 262.0 (142–5870)       | 286.7 (94–1337)        | 0.641 / 0.640                       |
| Ferritin                    | 16462 (3996–29630)    | 11380 (2878–45935)     | 14874 (2909–44483)     | 0.996 / 0.641                       |
| Fibrinogen                  | 65999 (32876–141400)  | 87763 (16339–206335)   | 117385 (36066–250824)  | 0.365 / 0.354                       |
| Haptoglobin                 | 98859 (30485–3960000) | 117740 (38432–3440000) | 268488 (11679–4440007) | 0.945 / 0.078                       |
| Procalcitonin               | 11986 (267–21045)     | 9626 (21–23136)        | 9920 (202–21045)       | 0.931 / 0.978                       |
| Amyloid A                   | 1772 (376–2865)       | 1512 (213–7525)        | 1368 (381–3245)        | 0.742 / 0.945                       |
| Plasminogen                 | 12843 (4381–66937)    | 8287 (70–69998)        | 13231 (446–55870)      | 0.641 / 0.813                       |
| Amyloid P                   | 9938 (2387–20544)     | 8610 (1111–23130)      | 9047 (930–19910)       | 0.887 / 0.763                       |

Data presented as median (range); \*p value comparing SD (starting doses) to DD; \*\*p value comparing DD to SD (final doses)

AAT, Alpha 1 antitrypsin; CRP, C-reactive protein; DD, double dose; IL, interleukin; IFN, interferon; SD, standard dose; TNF, tumor necrosis factor

**Table E6:** Summary of reported AEs and SAEs

| Subject Number | Study Phase | Description                                                                                                          | Causality/Relation to DD AAT therapy | Causality/Relation to study procedures | Severity, Seriousness <sup>†</sup> |
|----------------|-------------|----------------------------------------------------------------------------------------------------------------------|--------------------------------------|----------------------------------------|------------------------------------|
| 3              | 1           | Mild stridor post-bronchoscopy; found to have oropharyngeal candidiasis (removed from study)                         | Not related                          | Likely                                 | Mild, Not serious                  |
| 7              | 1           | Mild COPD exacerbation                                                                                               | Not related                          | Not related                            | Mild, Not serious                  |
| 9              | 1           | Mild COPD exacerbation                                                                                               | Not related                          | Not related                            | Mild, Not serious                  |
| 10             | 1           | Mild COPD exacerbation                                                                                               | Not related                          | Not related                            | Mild, Not serious                  |
| 1              | 1           | Dyspnea, hemoptysis requiring hospitalization 3 days after bronchoscopy – probable exacerbation (removed from study) | Not related                          | Probable                               | Severe, Serious                    |
| 3              | 1           | Severe COPD exacerbation requiring hospitalization, influenza                                                        | Not related                          | Not related                            | Severe, Serious                    |
| 5              | 2           | Arm bruise                                                                                                           | Not related                          | Likely                                 | Mild, Not serious                  |
| 6              | 2           | Nausea and anxiety 1 day post-bronchoscopy                                                                           | Not related                          | Probable                               | Mild, Not serious                  |
|                |             | Rash on forearm                                                                                                      | Not related                          | Not related                            | Mild, Not serious                  |
| 8              | 3           | Severe COPD exacerbation requiring hospitalization, hemoptysis, pneumonia days after third bronchoscopy              | Not related                          | Probable                               | Severe, Serious                    |

<sup>†</sup>Defined based on treatment usage

AAT, alpha-1 antitrypsin; AE, adverse event; COPD, chronic obstructive pulmonary disease; DD, double dose; SAE, serious adverse event.

## REFERENCES

1. Busse WW, Wanner A, Adams K, Reynolds HY, Castro M, Chowdhury B, Kraft M, Levine RJ, Peters SP, Sullivan EJ. Investigative bronchoprovocation and bronchoscopy in airway diseases. *American journal of respiratory and critical care medicine* 2005; 172: 807-816.
2. Moore WC, Evans MD, Bleecker ER, Busse WW, Calhoun WJ, Castro M, Chung KF, Erzurum SC, Curran-Everett D, Dweik RA, Gaston B, Hew M, Israel E, Mayse ML, Pascual RM, Peters SP, Silveira L, Wenzel SE, Jarjour NN, National Heart L, Blood Institute's Severe Asthma Research G. Safety of investigative bronchoscopy in the Severe Asthma Research Program. *The Journal of allergy and clinical immunology* 2011; 128: 328-336 e323.
